# Supplementary material
Source: PubMed Central journal article supplement (PMC5807083)

# Supplemental Figure 1: Neutralizing antibody titers against BNP116 in HF study

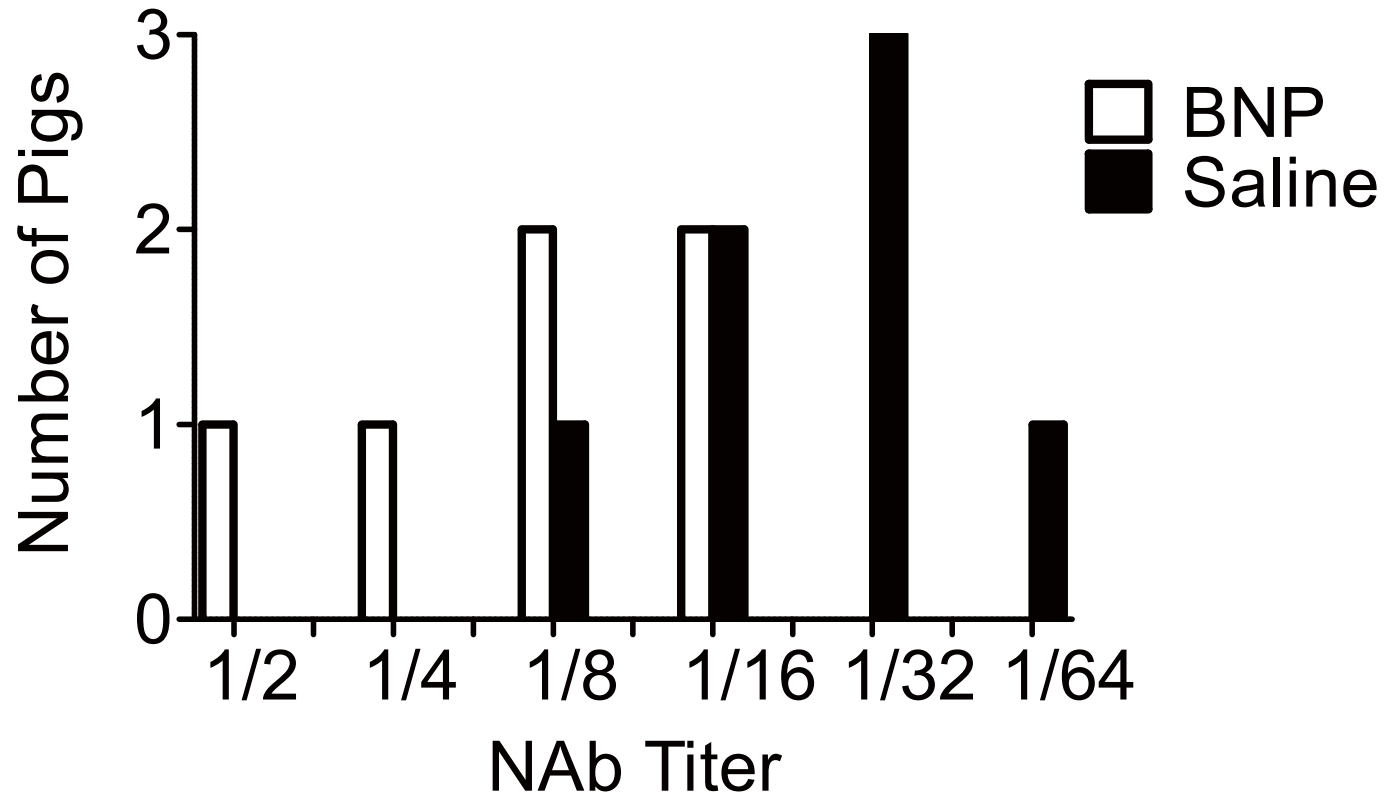

# Supplemental Figure 2: LV systolic function and volumes between saline and BNP, before and after gene therapy

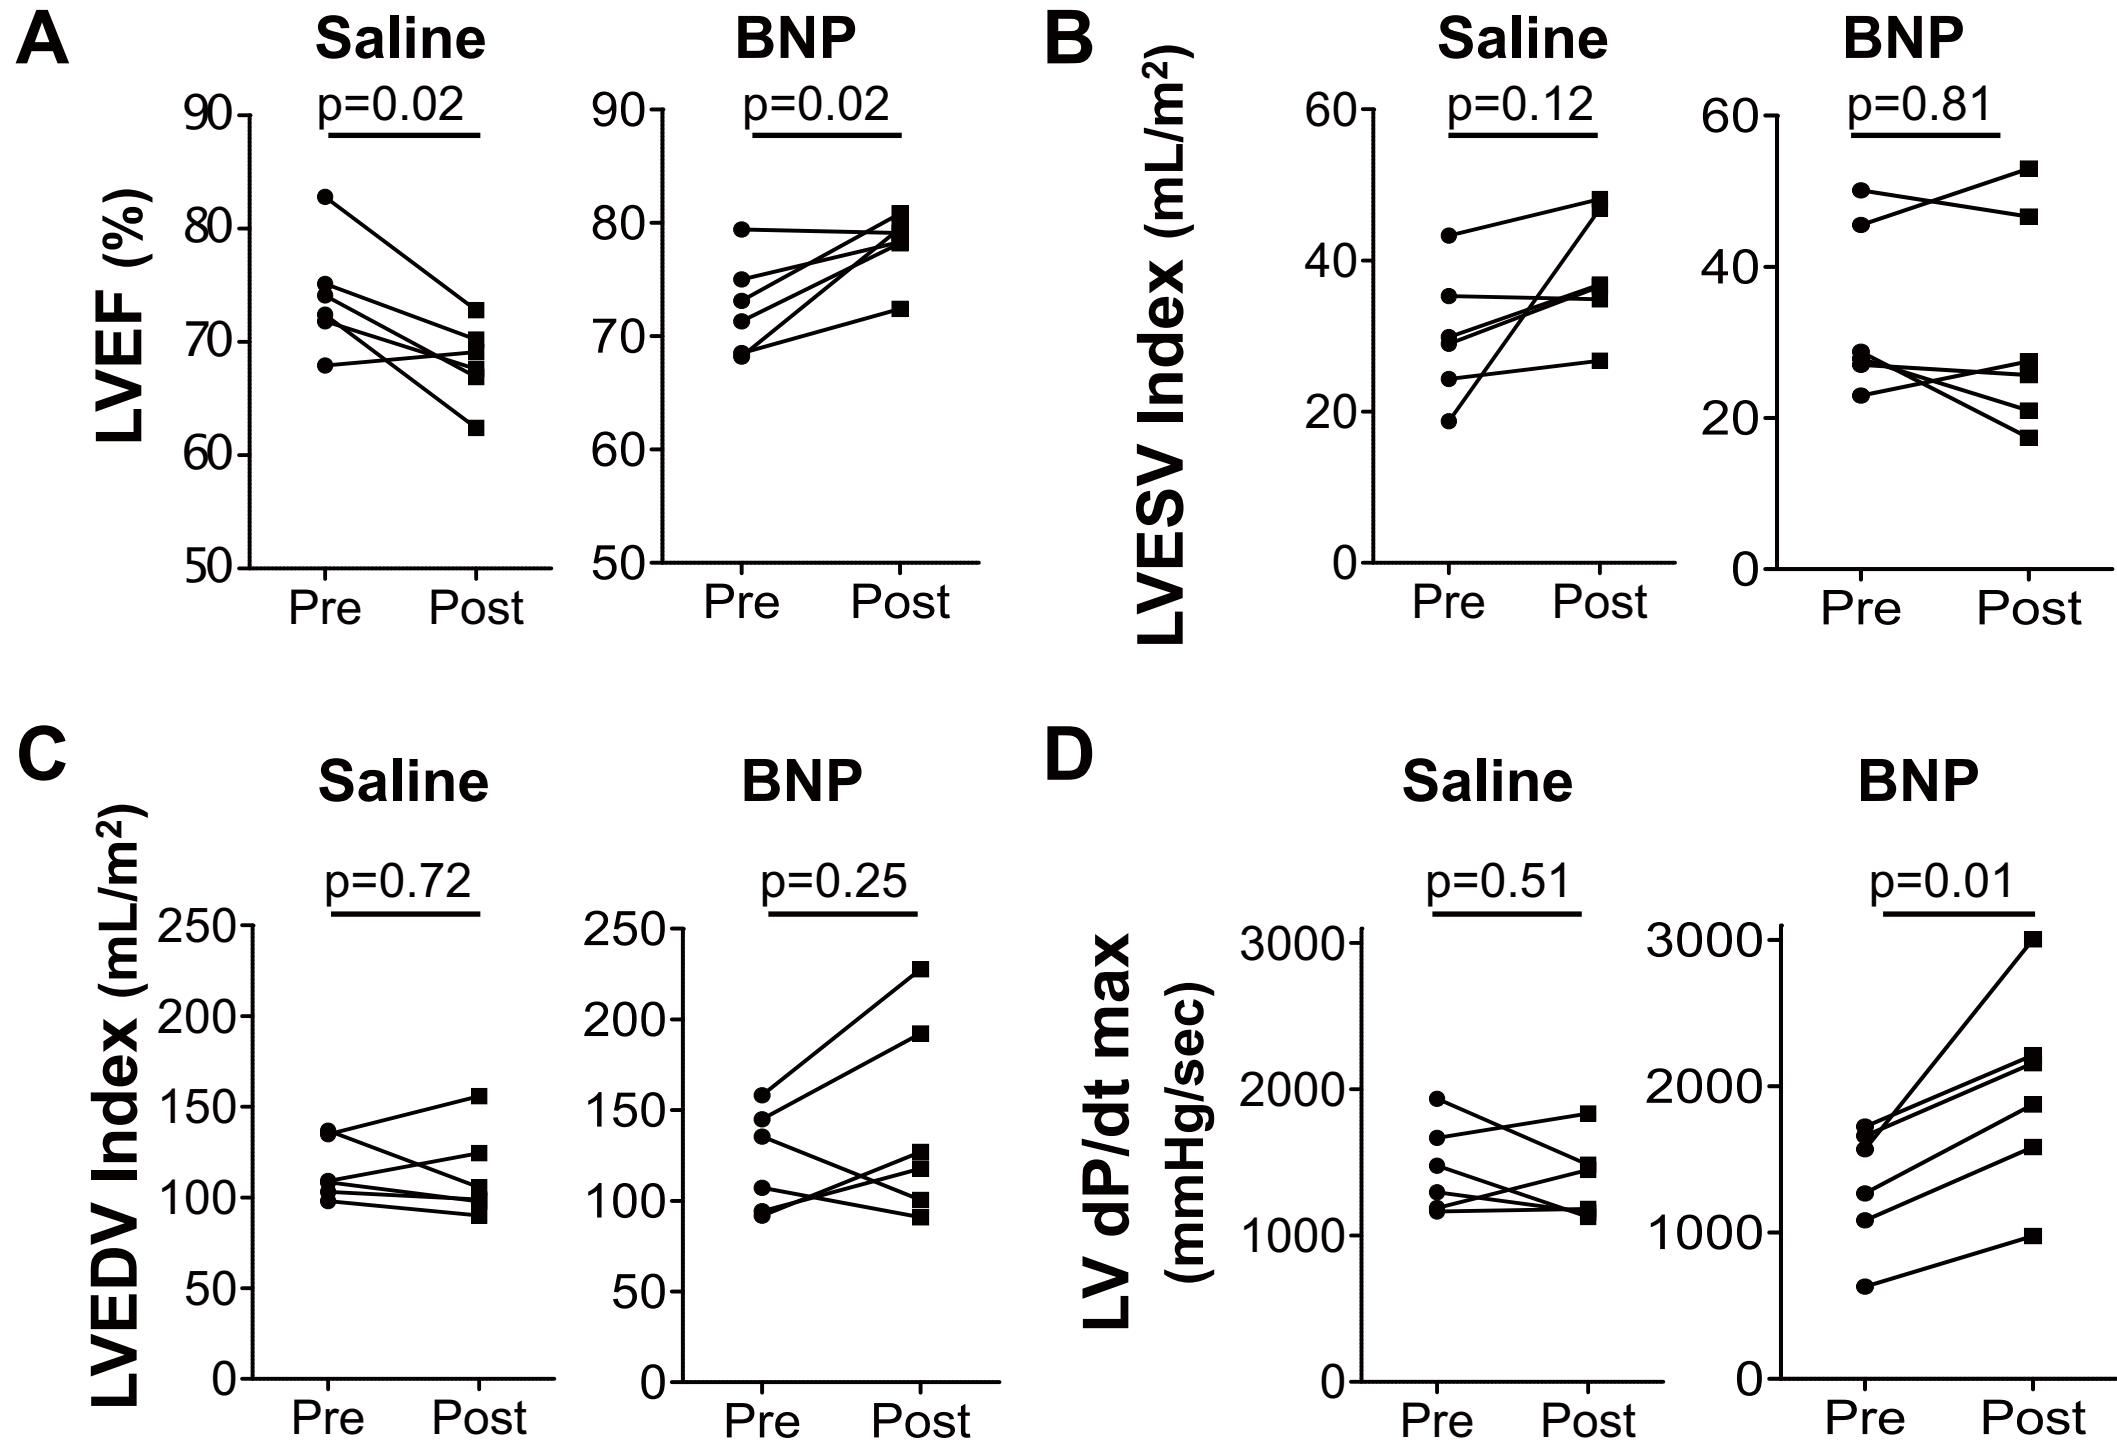

# Supplemental Figure 3: I-1c protein detection in HEK293 cells and isolated cardiomyocytes

**A**

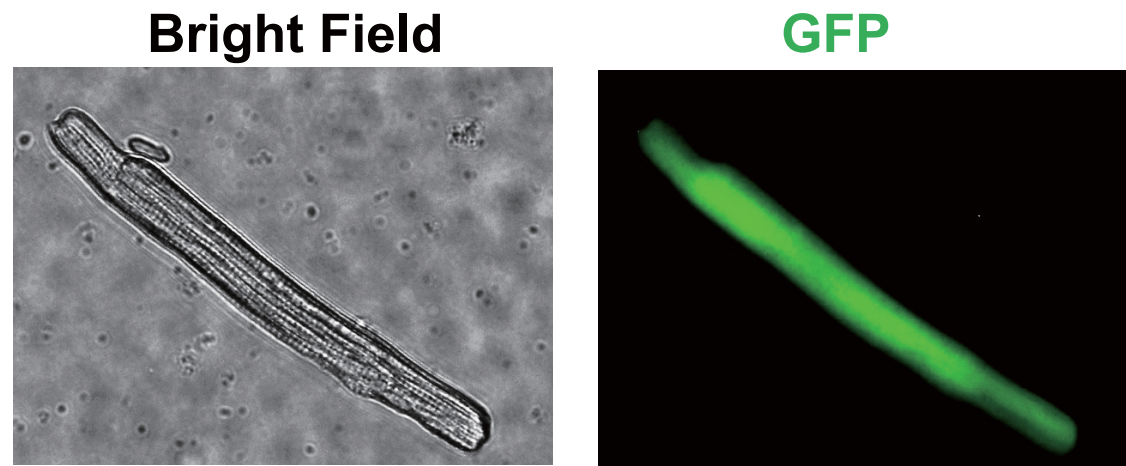

**B**

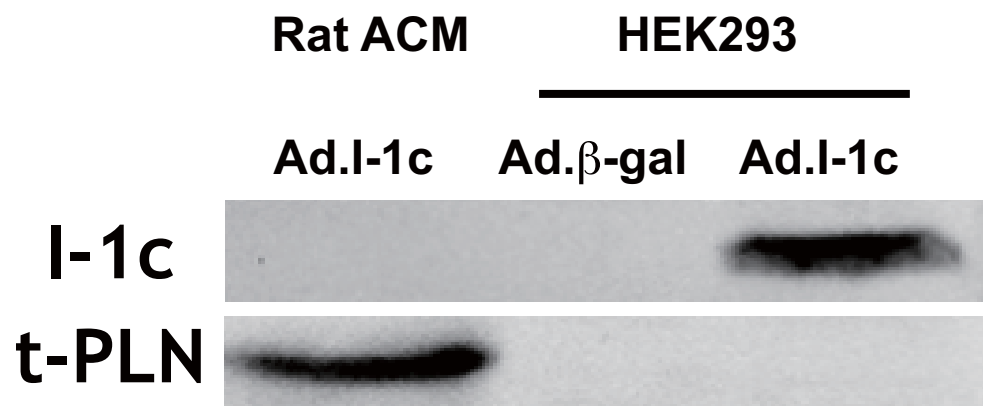

**C**

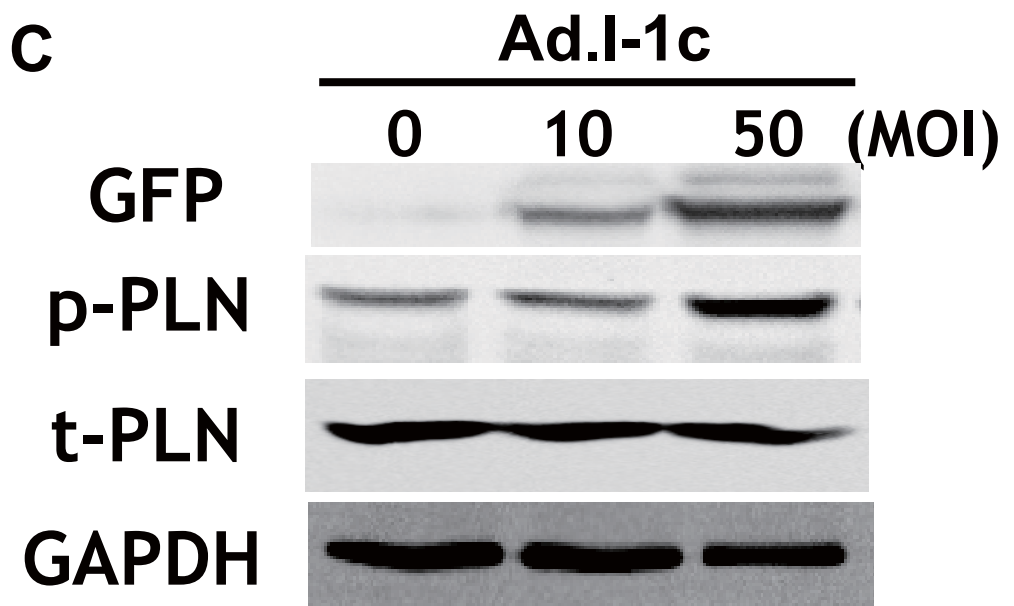

# Supplemental Figure 4: LA 3D echocardiography data

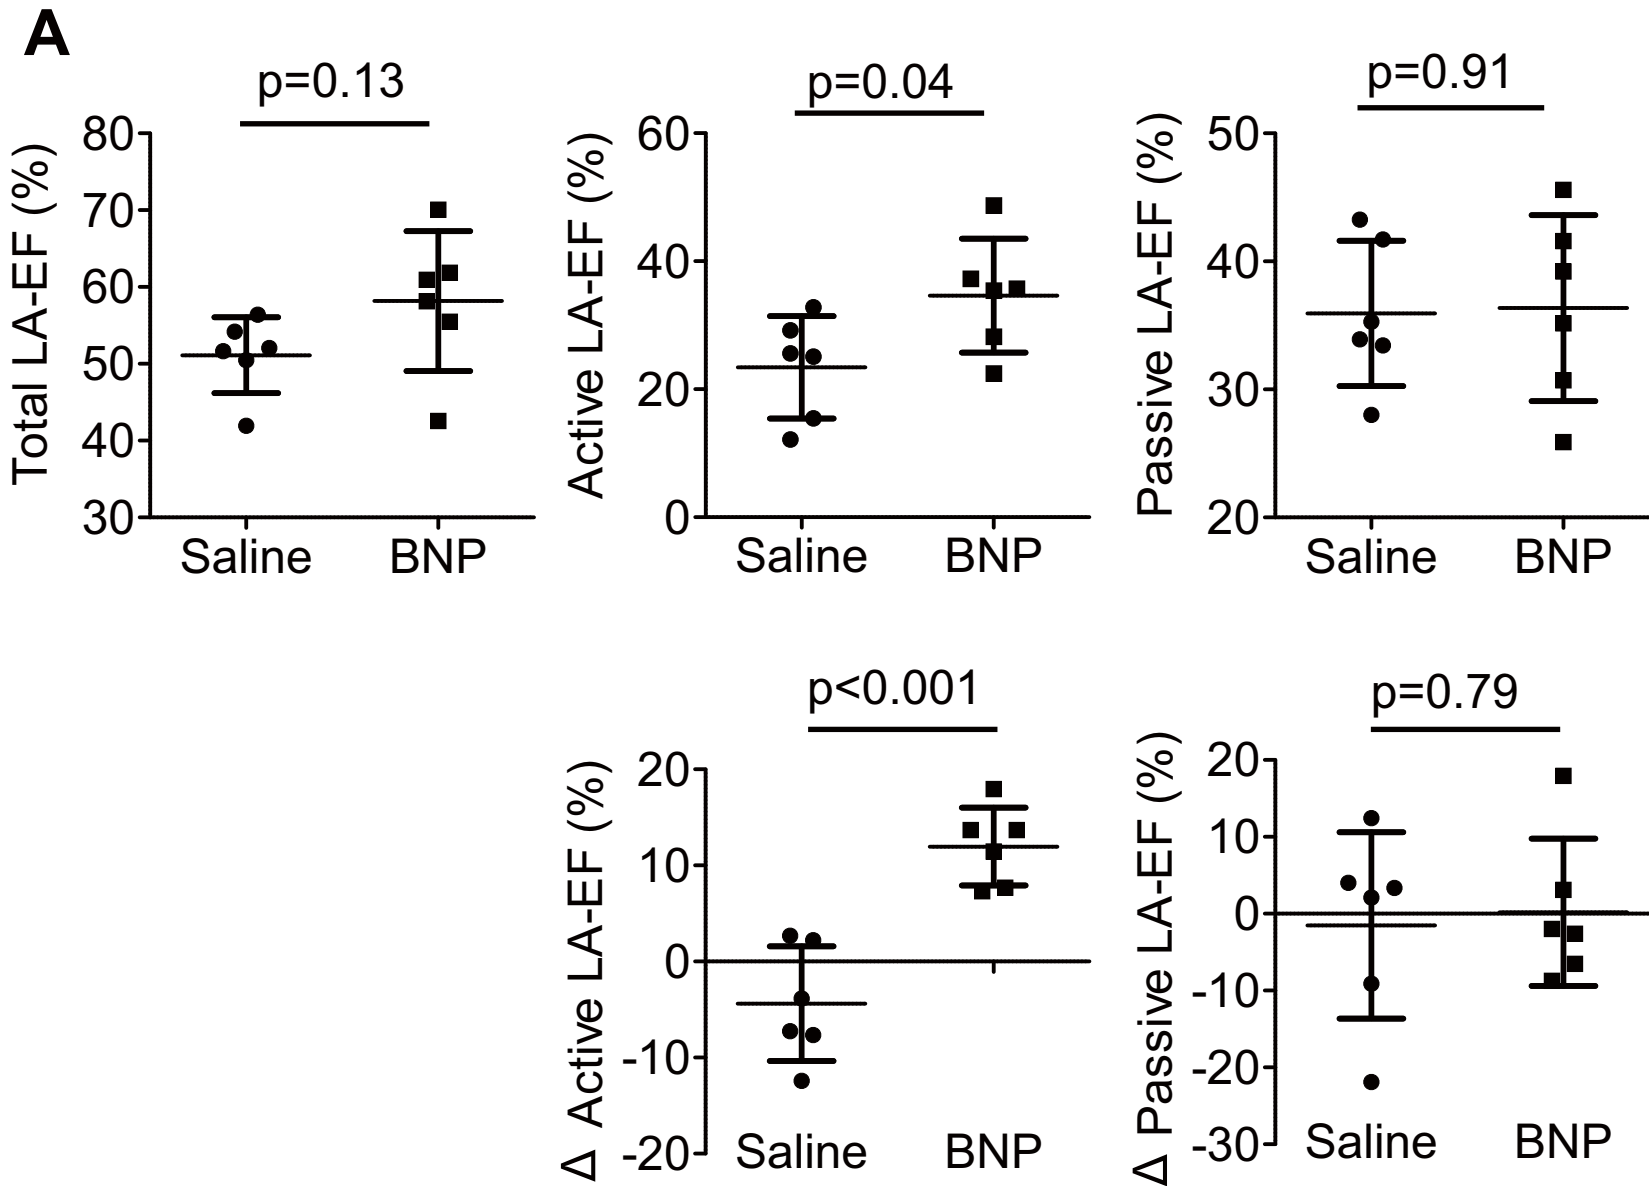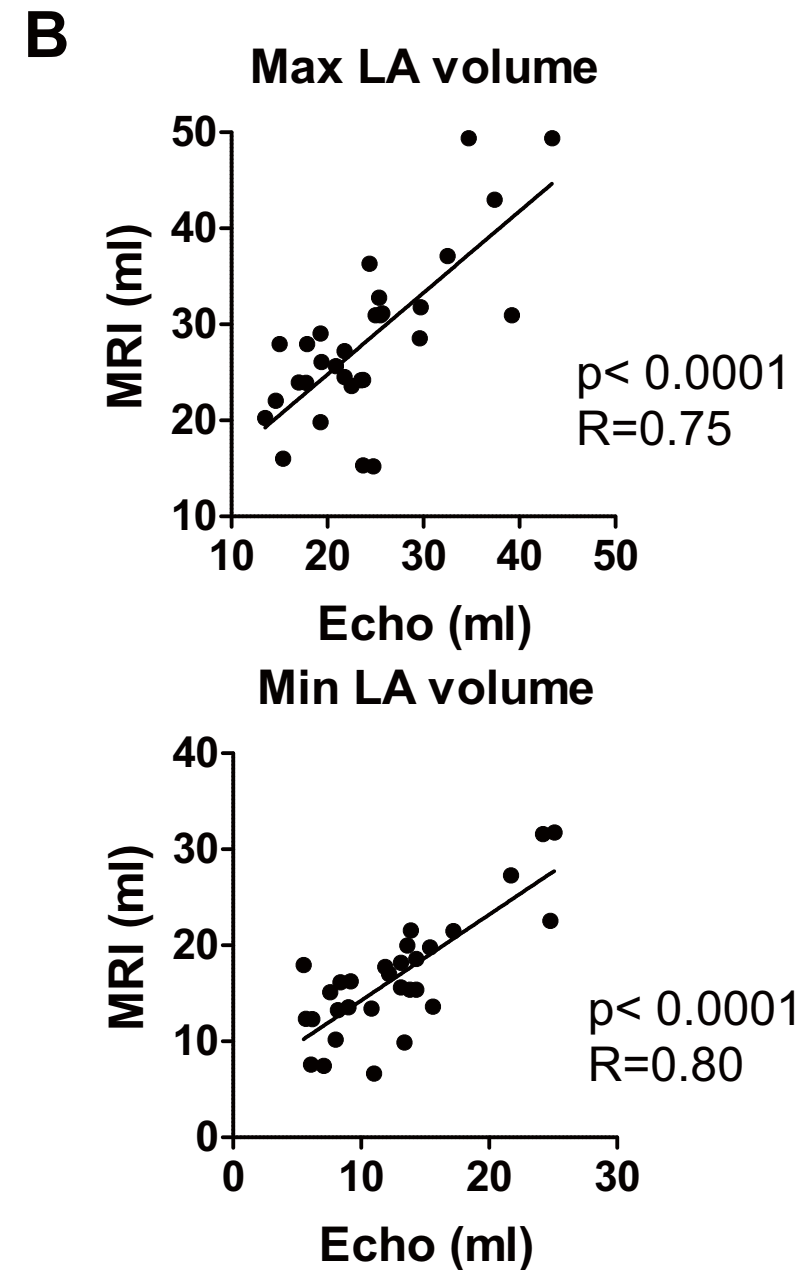

# Supplemental Figure 5: Impact of I-1c gene transfer on I-1c expression and its downstream gene expression in the LA

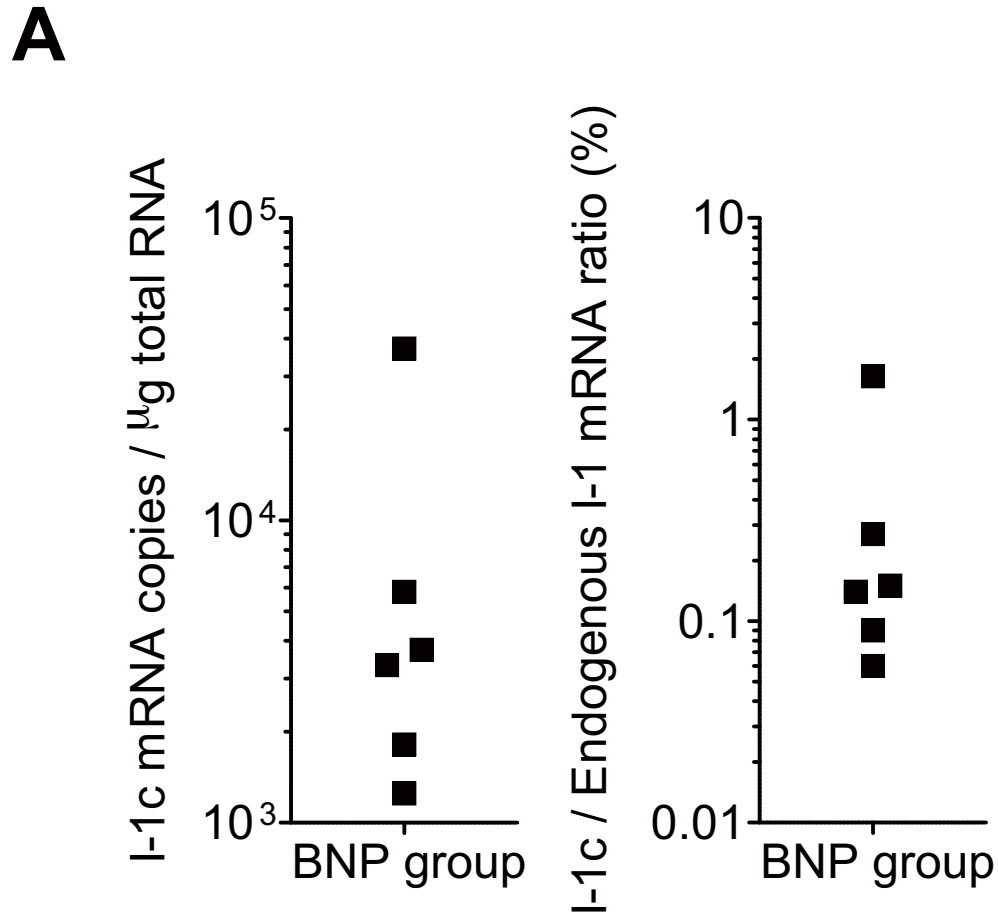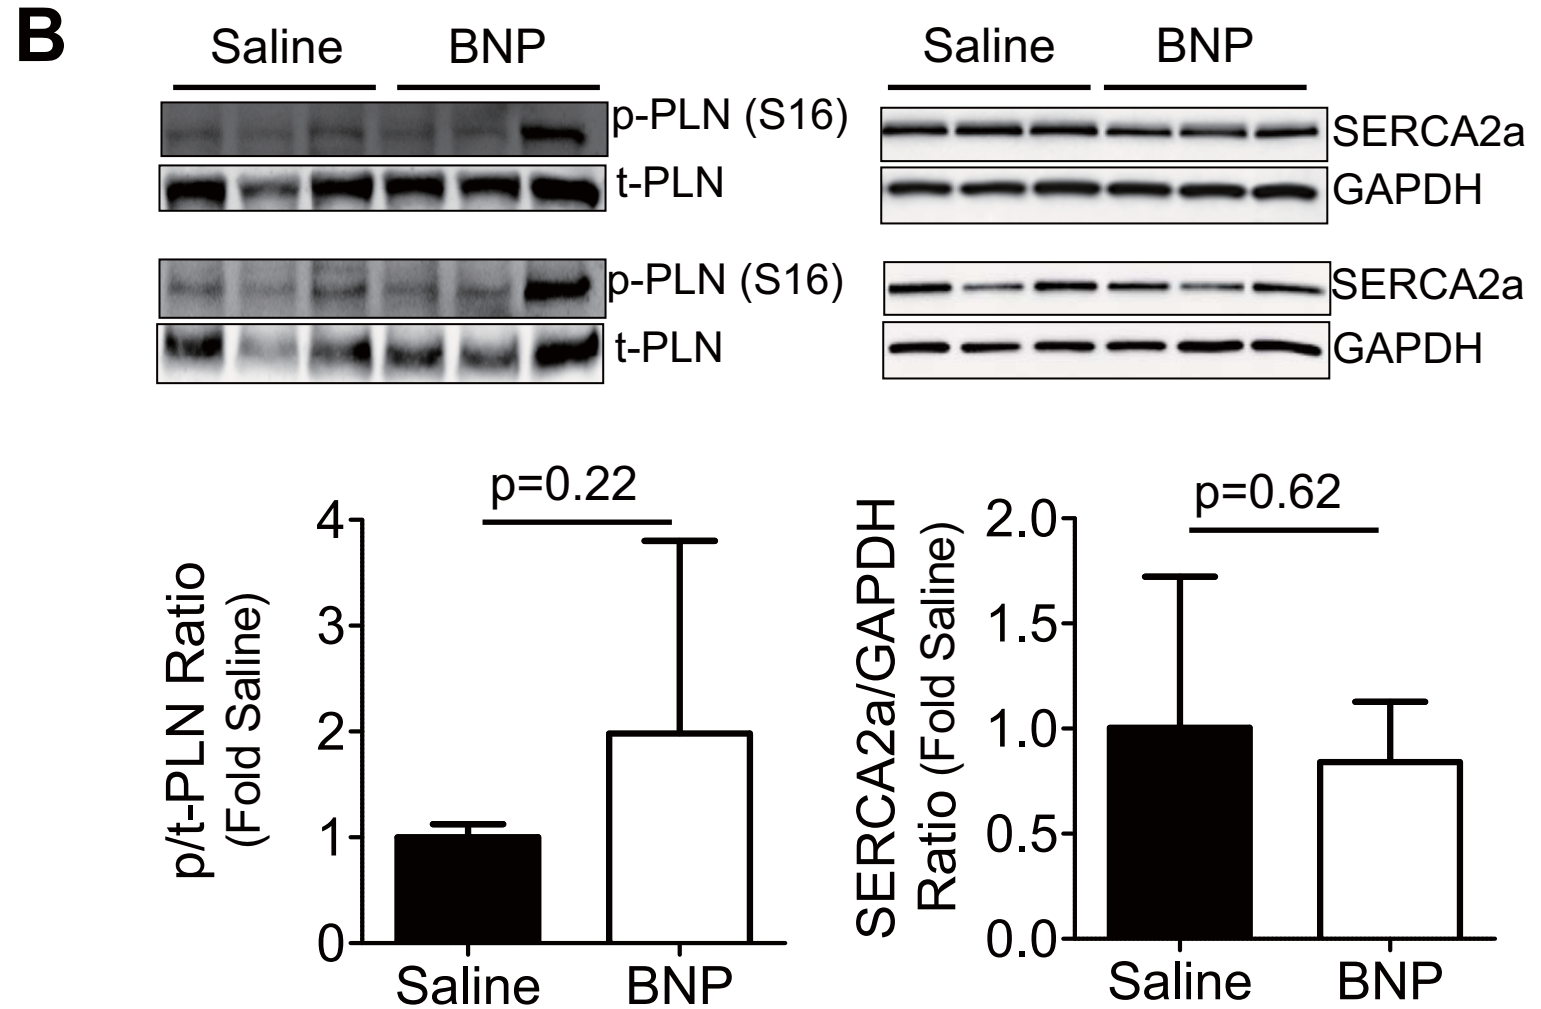

# Supplemental Figure 6: Total phospholamban expression in LA compared to LV

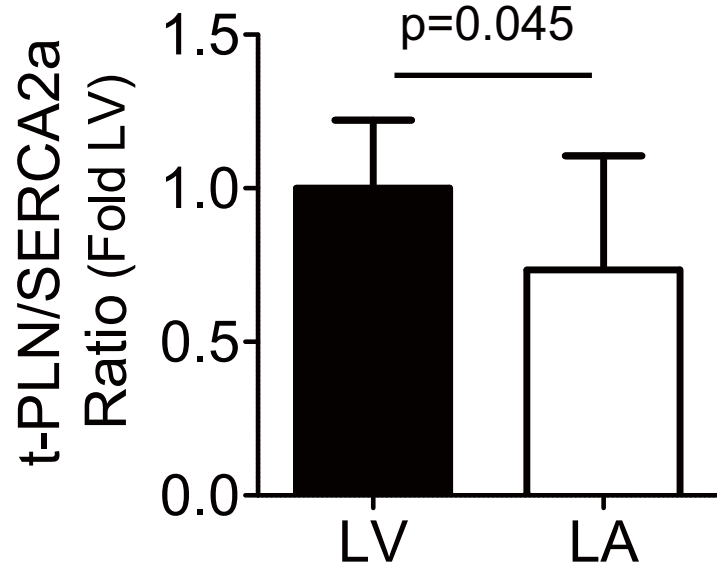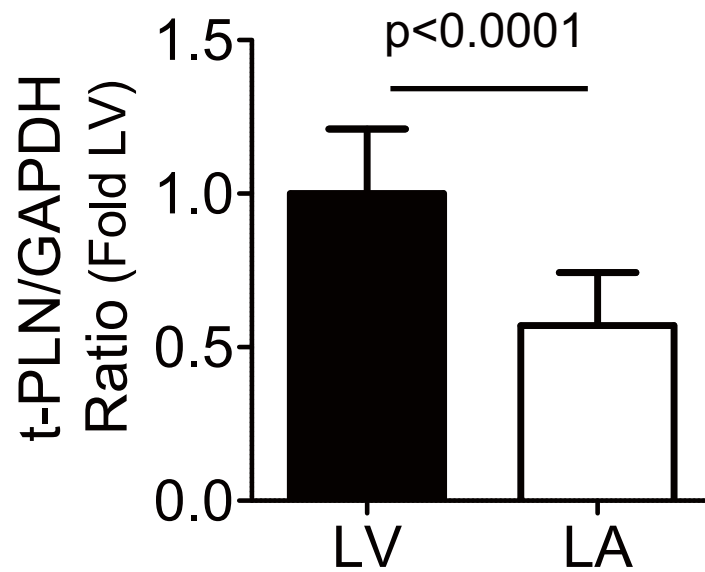

# Supplemental Figure 7: Comparisons of changes in echocardiographic parameters after vector administration in naïve pigs

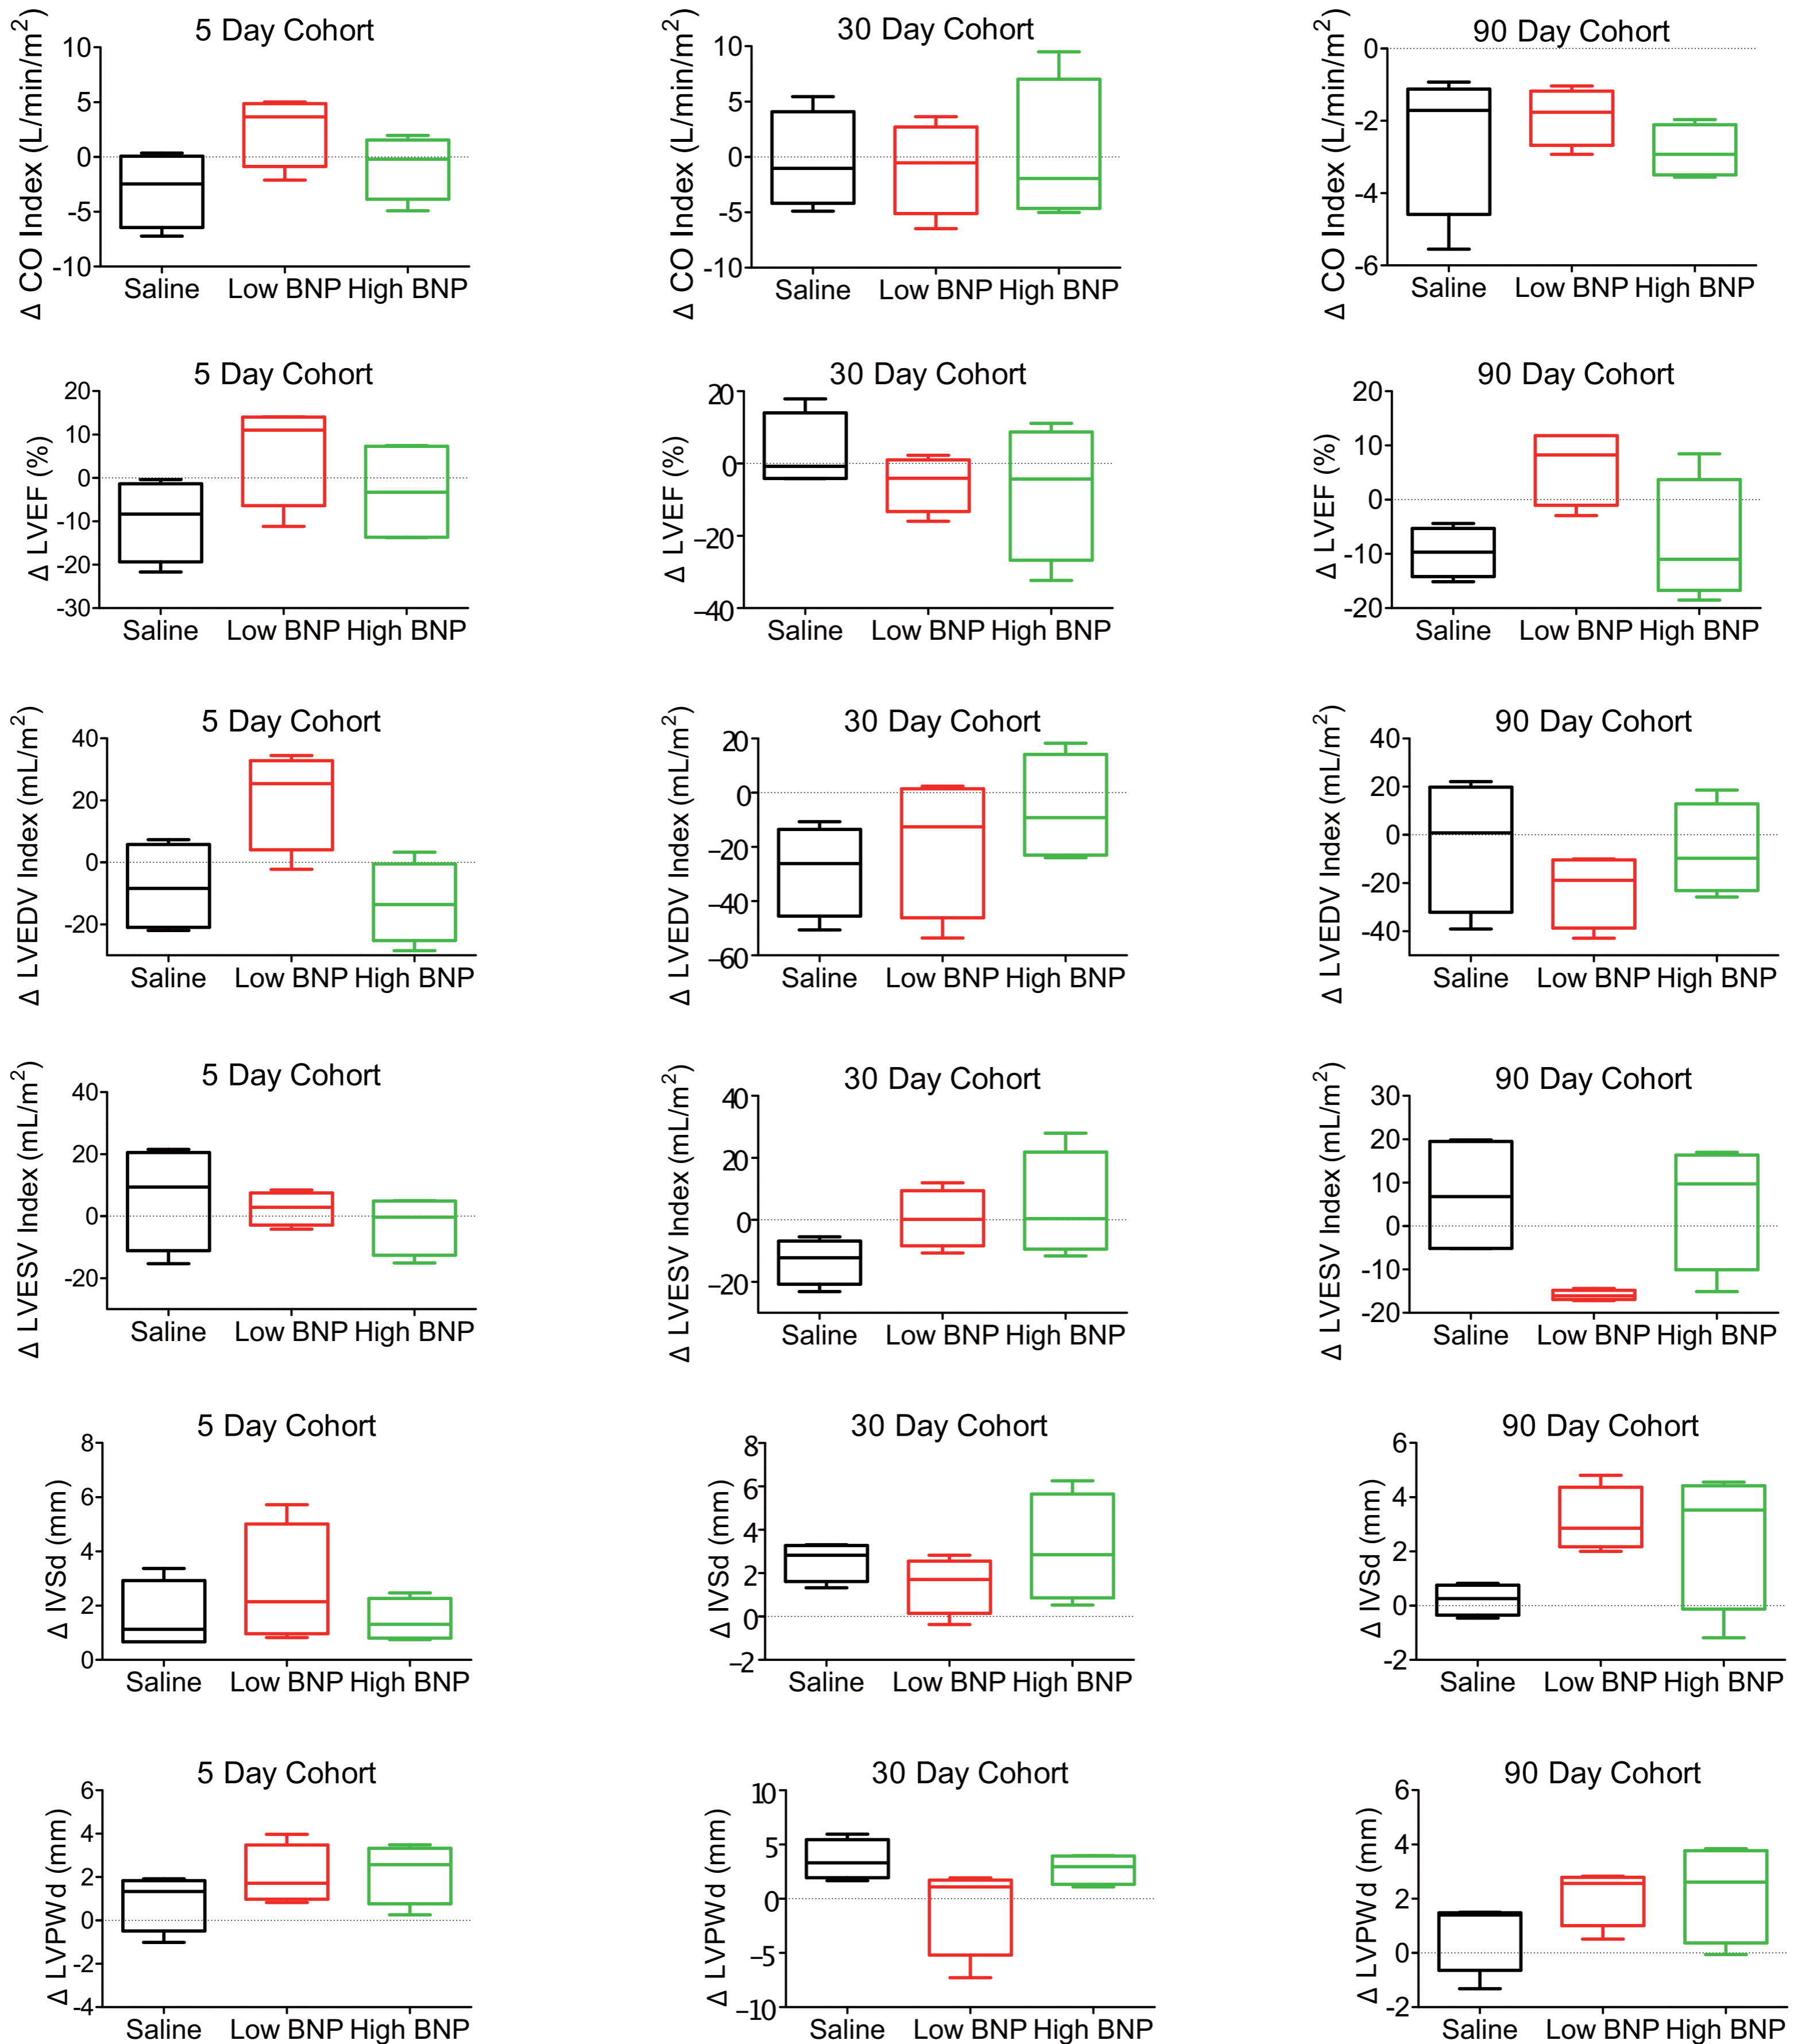

# Supplemental Figure 8: Vector genome distribution after different dose and time point in naïve pigs

Vector Genome Copies/  $\mu\text{g}$  gDNA

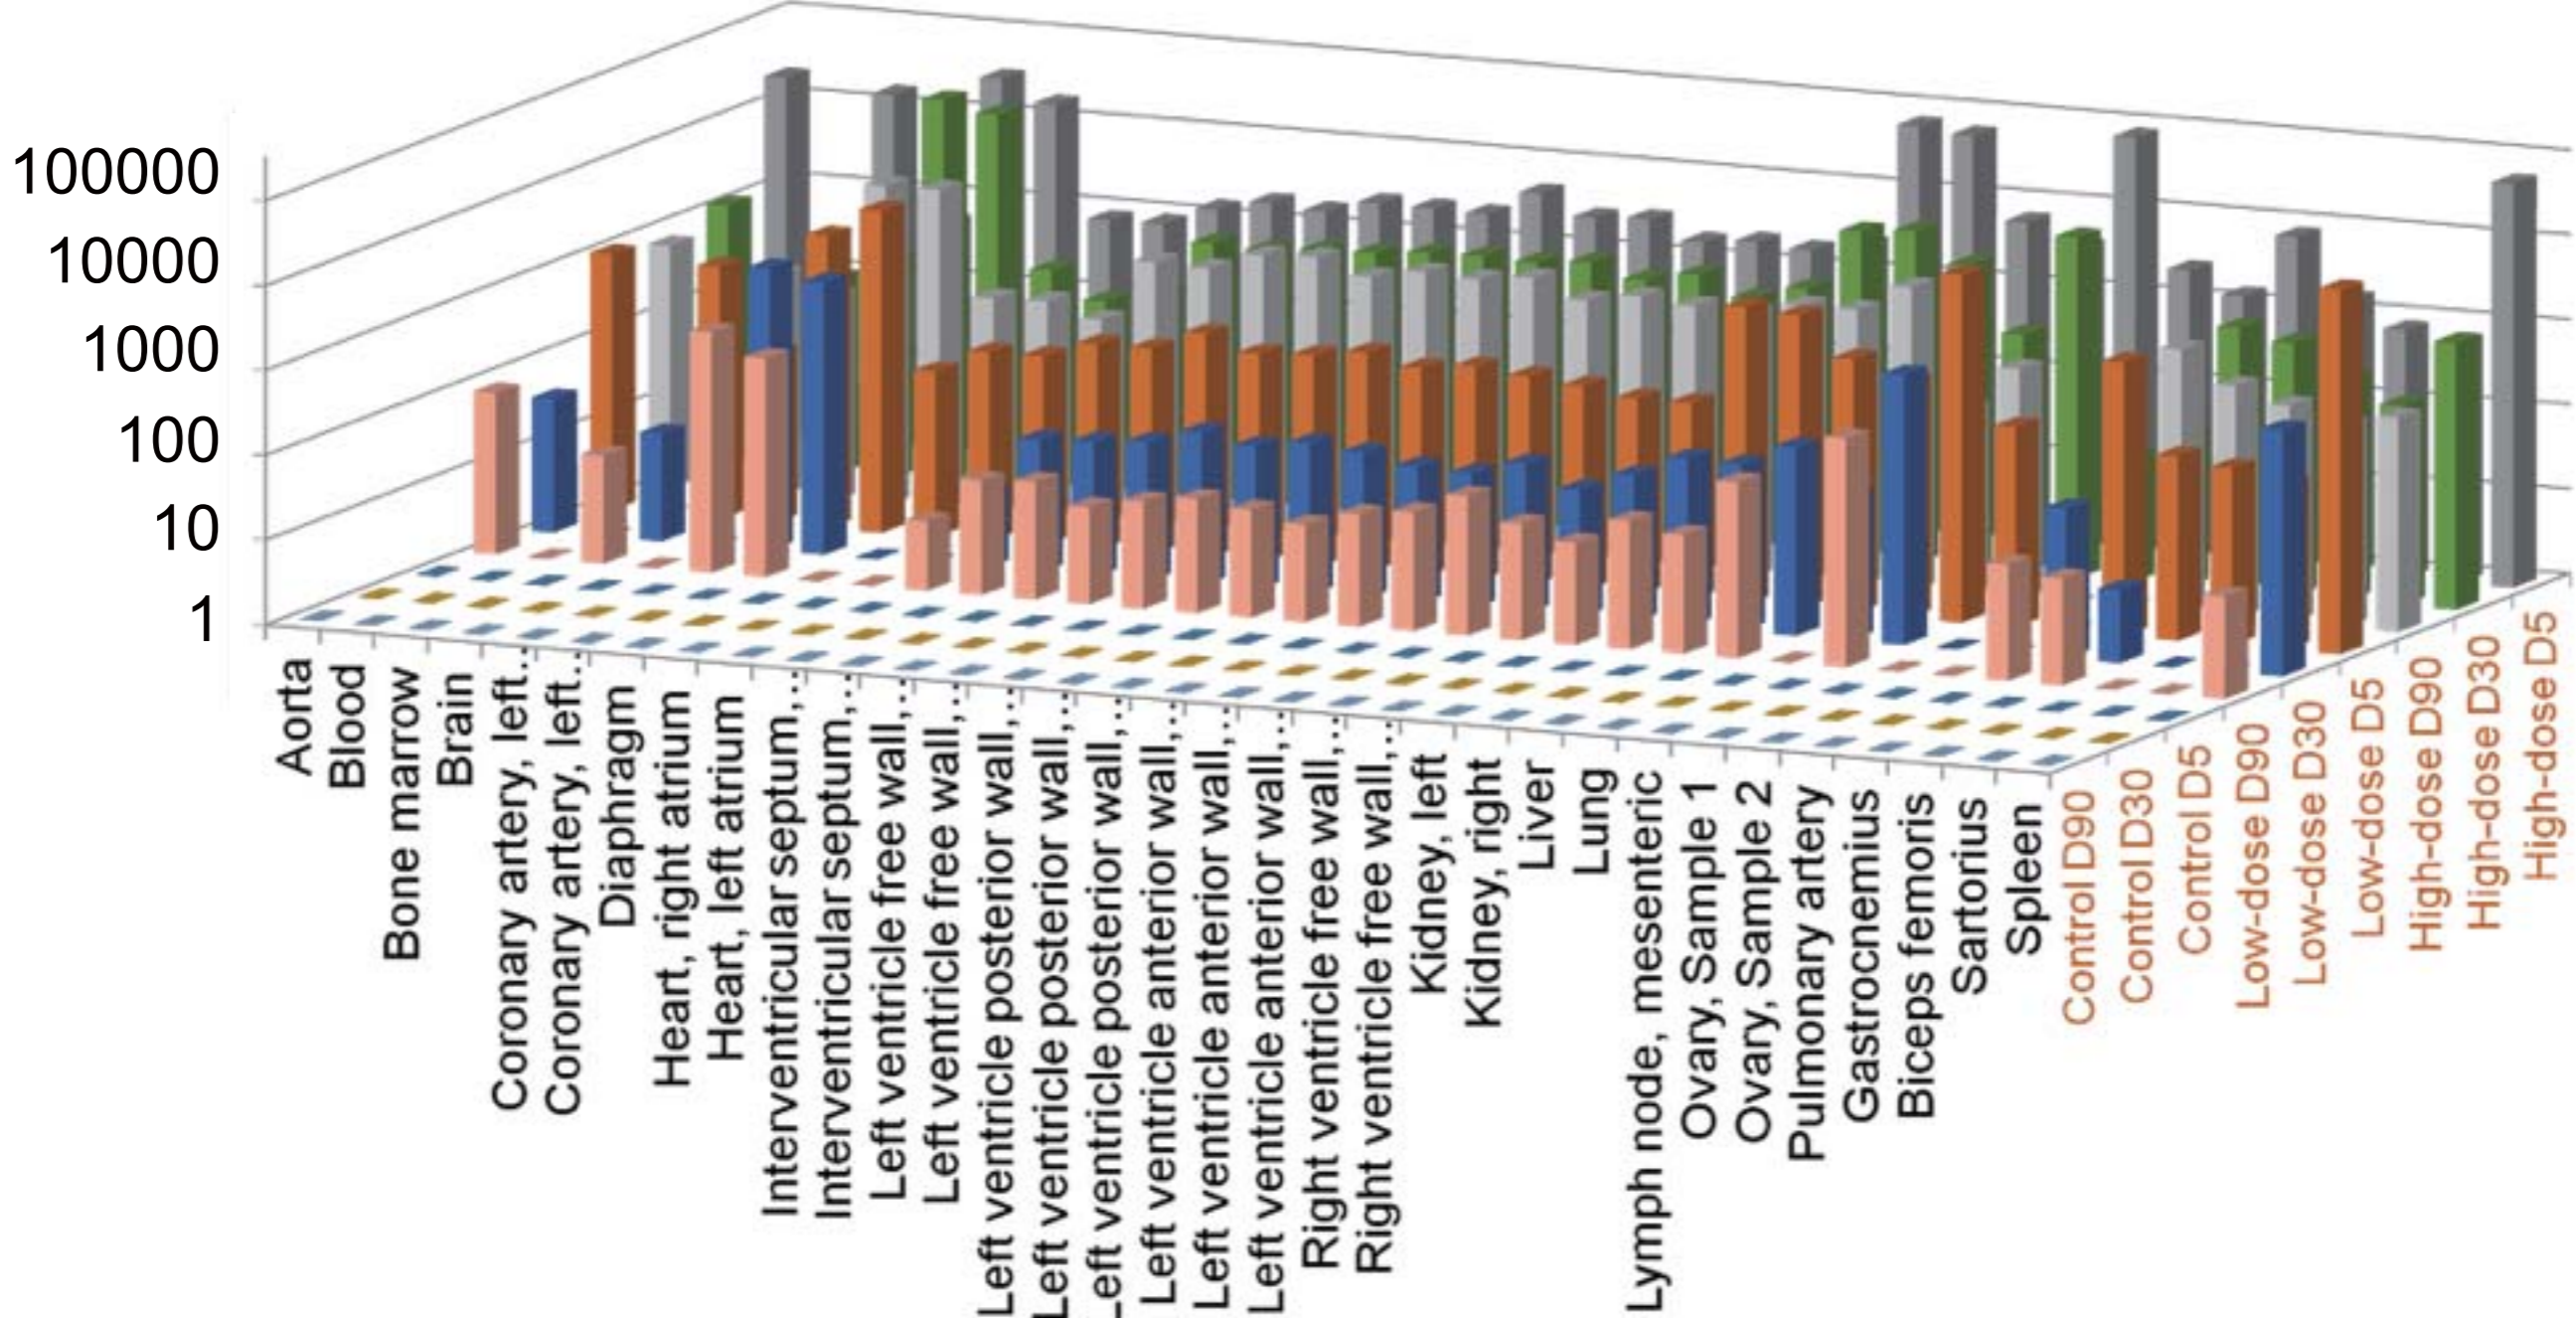



# Supplemental Figure 9: Neutralizing antibody titers against BNP116 in naïve pigs and the changes in titer after vector delivery

**A**

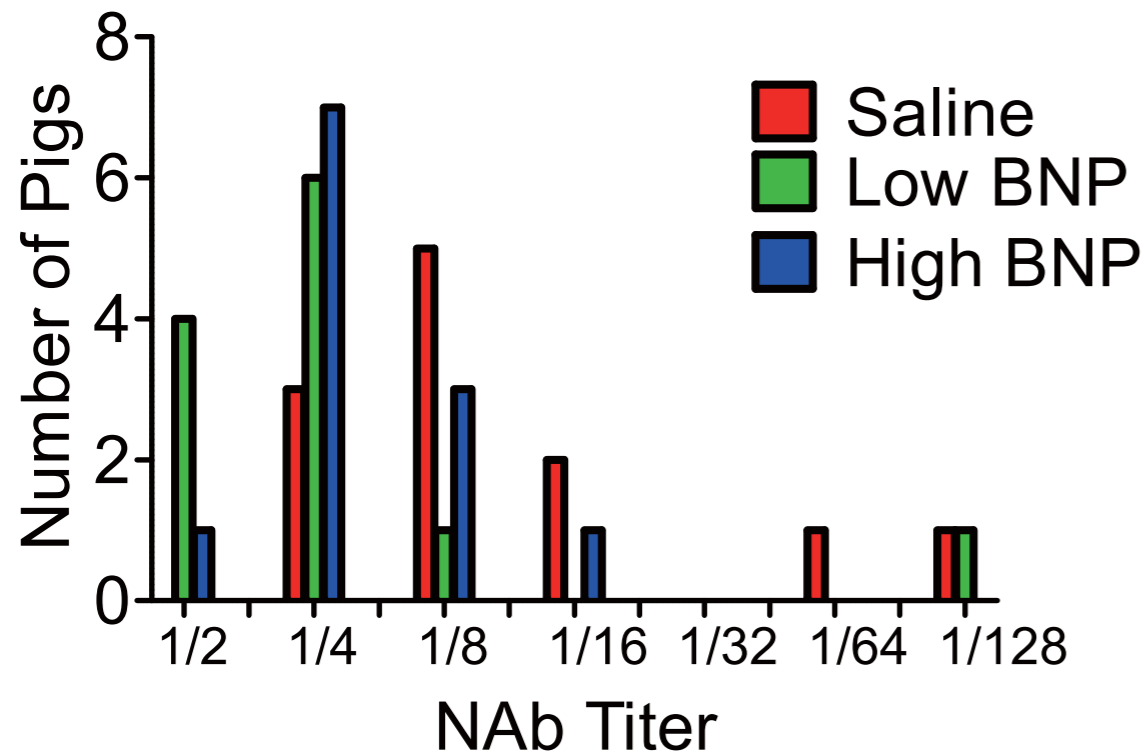

**B**

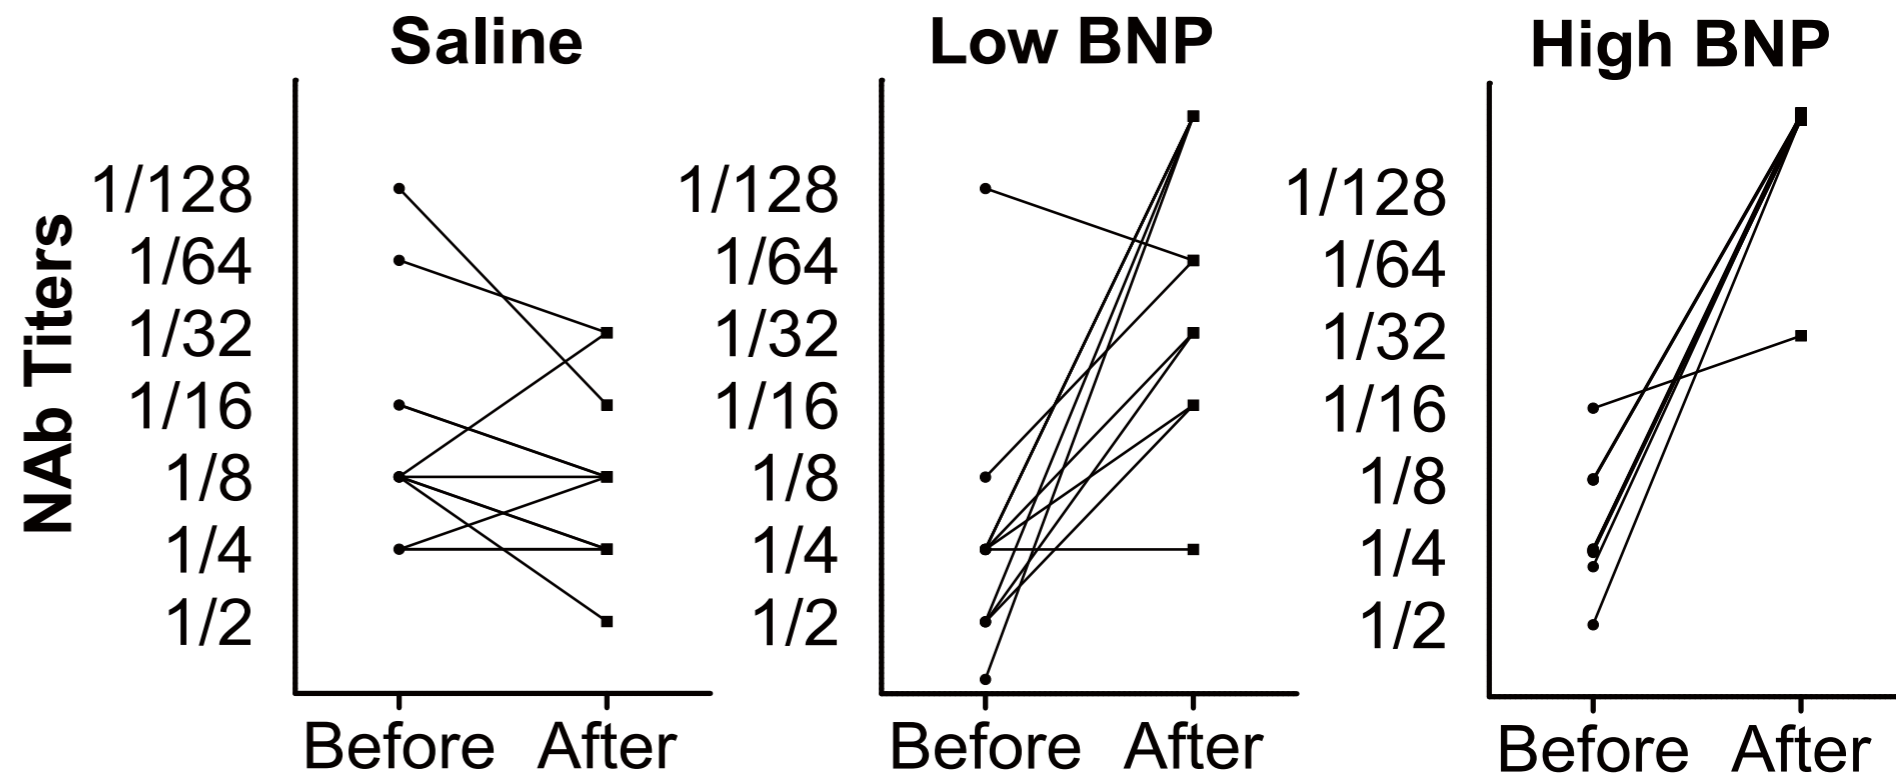

# Supplemental Figure 10: Lack of T-cell infiltration in the LV and absence of pathological histology findings associated with vector delivery in the off-target organs.

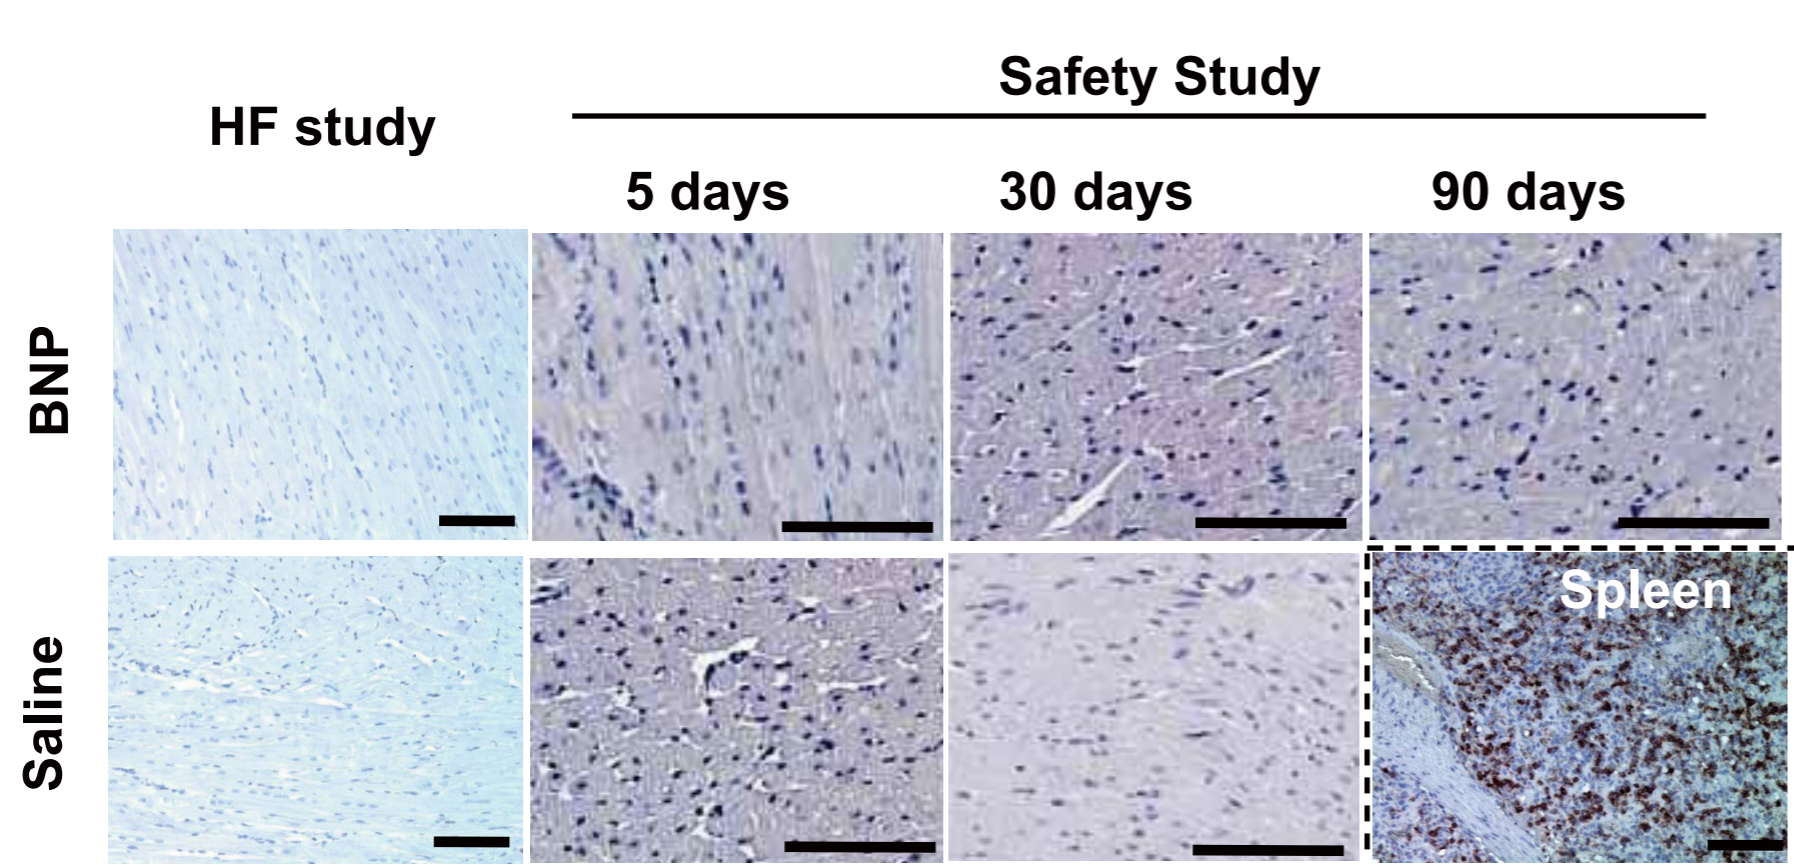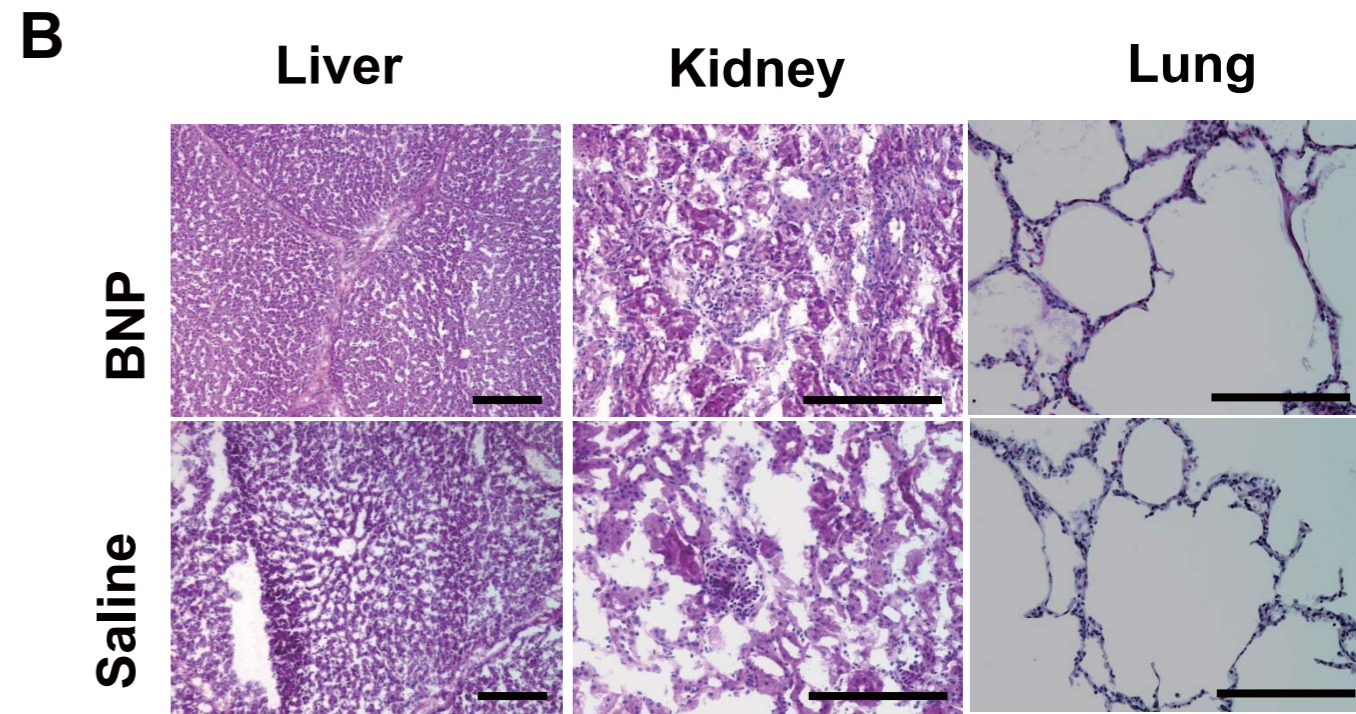

Supplement: NIHMS902638-supplement.pdf [file NIHMS902638-supplement.pdf]
